# Supplementary material
Source: PubMed Central journal article supplement (PMC3110886)
Supplement: supptables.pdf [file supptables.pdf]

1 **Supplemental Table 1. Fold changes and significance of microRNA target gene sets in**  
2 **CCA vs FPA comparison.** Only the highly abundant microRNAs (qPCR Ct value < 30) are  
3 included.

**Total CCA vs FPA**

| <b>microRNA</b> | <b>Fold Change</b> | <b>p-value</b> | <b>Significant target genes</b> | <b>Fold change</b> | <b>p-value</b> |
|-----------------|--------------------|----------------|---------------------------------|--------------------|----------------|
| <b>miR-98</b>   | 0.77               | 0.043          | SLC35D2                         | 1.37               | 0.015          |
| miR-98          | 0.77               | 0.043          | IGF1R                           | 1.67               | 0.009          |
| <b>miR-107</b>  | 0.69               | 0.016          | GALNT7                          | 1.35               | 0.014          |
| miR-107         | 0.69               | 0.016          | ANKFY1                          | 1.19               | 0.035          |
| miR-107         | 0.69               | 0.016          | ACVR2B                          | 1.26               | 0.047          |
| miR-107         | 0.69               | 0.016          | RASSF5                          | 1.45               | 0.041          |
| miR-107         | 0.69               | 0.016          | NEDD9                           | 1.47               | 0.043          |
| miR-107         | 0.69               | 0.016          | YWHAH                           | 1.14               | 0.049          |
| miR-107         | 0.69               | 0.016          | HTR4                            | 1.46               | 0.048          |
| <b>miR-130b</b> | 0.72               | 0.014          | EPS15                           | 1.25               | <0.001         |
| miR-130b        | 0.72               | 0.014          | SMAD5                           | 1.57               | 0.022          |
| miR-130b        | 0.72               | 0.014          | SNX5                            | 1.13               | 0.024          |
| miR-130b        | 0.72               | 0.014          | AKAP11                          | 1.25               | 0.022          |
| miR-130b        | 0.72               | 0.014          | PTPRM                           | 1.39               | 0.046          |
| miR-130b        | 0.72               | 0.014          | USP33                           | 1.28               | 0.047          |
| miR-130b        | 0.72               | 0.014          | UBL3                            | 1.24               | 0.055          |
| <b>miR-15b</b>  | 0.72               | 0.027          | IGF1R                           | 1.67               | 0.009          |
| miR-15b         | 0.72               | 0.027          | ZADH2                           | 1.37               | 0.016          |
| miR-15b         | 0.72               | 0.027          | SMAD5                           | 1.57               | 0.022          |
| miR-15b         | 0.72               | 0.027          | AP1GBP1                         | 1.29               | 0.031          |
| miR-15b         | 0.72               | 0.027          | GRIN1                           | 1.56               | 0.043          |
| miR-15b         | 0.72               | 0.027          | GNA12                           | 1.33               | 0.048          |
| miR-15b         | 0.72               | 0.027          | DNAJA2                          | 1.33               | 0.056          |
| <b>miR-195</b>  | 0.57               | 0.006          | BTG2                            | 1.45               | 0.049          |
| <b>miR-497</b>  | 0.62               | 0.001          | OSBPL7                          | 1.35               | 0.034          |
| <b>miR-16</b>   | 0.74               | 0.008          | GORASP2                         | 1.3                | 0.049          |
| <b>miR-20a</b>  | 0.66               | 0.002          | EZH1                            | 1.42               | 0.023          |
| miR-20a         | 0.66               | 0.002          | RIPK5                           | 1.51               | 0.031          |
| miR-20a         | 0.66               | 0.002          | BNIP2                           | 1.49               | 0.038          |
| miR-20a         | 0.66               | 0.002          | NAGK                            | 1.23               | 0.042          |
| miR-20a         | 0.66               | 0.002          | CXADR                           | 1.21               | 0.051          |
| <b>miR-93</b>   | 0.65               | <0.001         | PTGFRN                          | 1.23               | 0.012          |
| miR-93          | 0.65               | <0.001         | NPAS2                           | 1.47               | 0.014          |

|                |      |        |        |      |       |
|----------------|------|--------|--------|------|-------|
| miR-93         | 0.65 | <0.001 | HDAC4  | 1.51 | 0.022 |
| miR-93         | 0.65 | <0.001 | NEDD4L | 1.16 | 0.057 |
| <b>miR-18a</b> | 0.65 | 0.015  | PTGFRN | 1.23 | 0.012 |
| miR-18a        | 0.65 | 0.015  | NOTCH2 | 1.45 | 0.013 |
| miR-18a        | 0.65 | 0.015  | NCOA1  | 1.32 | 0.011 |
| miR-18a        | 0.65 | 0.015  | LAT    | 1.55 | 0.018 |
| miR-18a        | 0.65 | 0.015  | WBP2   | 1.33 | 0.019 |
| miR-18a        | 0.65 | 0.015  | TMEM1  | 1.20 | 0.017 |
| miR-18a        | 0.65 | 0.015  | AEBP2  | 1.19 | 0.024 |
| miR-18a        | 0.65 | 0.015  | FNBP1  | 1.23 | 0.033 |
| miR-18a        | 0.65 | 0.015  | NEDD9  | 1.47 | 0.043 |
| <b>miR-19b</b> | 0.63 | <0.001 | GDA    | 1.26 | 0.011 |
| miR-19b        | 0.63 | <0.001 | WBP2   | 1.33 | 0.022 |

4

5

#### Polysomal CCA vs FPA

| microRNA        | Fold Change | p-value | Significant target genes | Fold change | p-value |
|-----------------|-------------|---------|--------------------------|-------------|---------|
| <b>miR-130b</b> | 0.72        | 0.014   | AKAP1                    | 4.04        | 0.012   |
| miR-130b        | 0.72        | 0.014   | MTF1                     | 1.52        | 0.013   |
| <b>miR-15b</b>  | 0.72        | 0.027   | GRID1                    | 1.18        | 0.057   |
| miR-15b         | 0.72        | 0.027   | SYNJ1                    | 1.49        | 0.048   |
| miR-15b         | 0.72        | 0.027   | SMAD5                    | 1.25        | 0.046   |
| miR-15b         | 0.72        | 0.027   | GGA3                     | 1.40        | 0.044   |
| miR-15b         | 0.72        | 0.027   | CYP26B1                  | 1.52        | 0.042   |
| miR-15b         | 0.72        | 0.027   | CDS2                     | 3.55        | 0.038   |
| miR-15b         | 0.72        | 0.027   | LYPLA2                   | 1.58        | 0.031   |
| miR-15b         | 0.72        | 0.027   | CASR                     | 1.71        | 0.022   |
| miR-15b         | 0.72        | 0.027   | DLGAP2                   | 1.23        | 0.011   |
| miR-15b         | 0.72        | 0.027   | EIF4E                    | 1.97        | 0.012   |
| miR-15b         | 0.72        | 0.027   | ABCG4                    | 1.95        | 0.008   |
| miR-15b         | 0.72        | 0.027   | BCL9L                    | 1.67        | <0.001  |
| miR-15b         | 0.72        | 0.027   | IHPK1                    | 1.56        | <0.001  |
| <b>miR-16</b>   | 0.74        | 0.008   | ADRB2                    | 1.37        | 0.043   |
| miR-16          | 0.74        | 0.008   | CDC42EP2                 | 1.21        | 0.012   |
| miR-16          | 0.74        | 0.008   | RET                      | 1.82        | 0.006   |
| <b>miR-497</b>  | 0.62        | 0.001   | LPHN1                    | 2.04        | 0.034   |
| <b>miR-93</b>   | 0.65        | <0.001  | PPP2R2A                  | 1.41        | 0.046   |
| miR-93          | 0.65        | <0.001  | EGR2                     | 1.45        | 0.041   |
| miR-93          | 0.65        | <0.001  | SLC9A2                   | 1.4         | 0.022   |

|                 |      |        |          |      |       |
|-----------------|------|--------|----------|------|-------|
| <b>miR20a</b>   | 0.66 | 0.002  | RIPK5    | 1.62 | 0.034 |
| miR20a          | 0.66 | 0.002  | MTF1     | 1.52 | 0.013 |
| miR20a          | 0.66 | 0.002  | SMOC2    | 1.66 | 0.007 |
| <b>miR-182</b>  | 0.74 | 0.013  | GRID1    | 1.18 | 0.057 |
| miR-182         | 0.74 | 0.013  | ACCN1    | 1.42 | 0.046 |
| miR-182         | 0.74 | 0.013  | NCAM1    | 1.37 | 0.036 |
| miR-182         | 0.74 | 0.013  | PLCG1    | 1.24 | 0.032 |
| miR-182         | 0.74 | 0.013  | LPHN1    | 2.04 | 0.034 |
| miR-182         | 0.74 | 0.013  | FOXO3    | 1.29 | 0.018 |
| miR-182         | 0.74 | 0.013  | SLC9A2   | 1.4  | 0.022 |
| miR-182         | 0.74 | 0.013  | PPP1R9B  | 1.39 | 0.013 |
| miR-182         | 0.74 | 0.013  | DLGAP2   | 1.23 | 0.011 |
| miR-182         | 0.74 | 0.013  | CDC42BPA | 1.28 | 0.011 |
| miR-182         | 0.74 | 0.013  | TGFBI    | 1.34 | 0.008 |
| miR-182         | 0.74 | 0.013  | STK10    | 1.39 | 0.012 |
| <b>miR-183</b>  | 0.74 | 0.009  | SMPD3    | 2.1  | 0.037 |
| miR-183         | 0.74 | 0.009  | SLC6A6   | 1.64 | 0.012 |
| miR-183         | 0.74 | 0.009  | CX3CL1   | 1.49 | 0.008 |
| <b>miR-18a</b>  | 0.65 | 0.015  | MTF1     | 1.52 | 0.013 |
| miR-18a         | 0.65 | 0.015  | LAT      | 1.43 | 0.013 |
| miR-18a         | 0.65 | 0.015  | XYTLT2   | 1.46 | 0.002 |
| <b>miR-19b</b>  | 0.63 | <0.001 | MAPK6    | 1.6  | 0.033 |
| <b>miR-196b</b> | 0.70 | 0.002  | HABP4    | 1.34 | 0.042 |

---

6

7

8

9

10

11 **Supplemental Table 2. Fold changes and significance of microRNA target gene sets in**12 **CCA vs FPA comparison.** Only the low abundant microRNAs (qPCR Ct value > 30) are

13 included.

**Total CCA vs FPA**

| <b>microRNA</b> | <b>Fold Change</b> | <b>p-value</b> | <b>Significant target genes</b> | <b>Fold change</b> | <b>p-value</b> |
|-----------------|--------------------|----------------|---------------------------------|--------------------|----------------|
| <b>miR-219</b>  | 0.44               | 0.008          | NCOA1                           | 1.32               | 0.011          |
| miR-219         | 0.44               | 0.008          | DAZAP1                          | 1.32               | 0.047          |
| <b>miR-9</b>    | 1.68               | <0.001         | AAK1                            | 0.60               | <0.001         |
| miR-9           | 1.68               | <0.001         | PAK6                            | 0.59               | 0.042          |
| miR-9           | 1.68               | <0.001         | NMT2                            | 0.63               | 0.047          |
| miR-9           | 1.68               | <0.001         | UHRF1                           | 0.59               | 0.046          |
| miR-9           | 1.68               | <0.001         | DIO2                            | 0.39               | 0.058          |

14

**Polysomal CCA vs FPA**

| <b>microRNAs</b> | <b>Fold Change</b> | <b>p-value</b> | <b>Significant target genes</b> | <b>Fold change</b> | <b>p-value</b> |
|------------------|--------------------|----------------|---------------------------------|--------------------|----------------|
| <b>miR-219</b>   | 0.44               | 0.008          | PIP5K1C                         | 1.62               | 0.044          |
| miR-219          | 0.44               | 0.008          | GTPBP1                          | 1.25               | 0.03           |
| <b>miR-9</b>     | 1.68               | <0.001         | ARFGEF2                         | 0.61               | 0.048          |
| miR-9            | 1.68               | <0.001         | CPEB4                           | 0.61               | 0.036          |
| miR-9            | 1.68               | <0.001         | PGRMC2                          | 0.69               | 0.028          |
| miR-9            | 1.68               | <0.001         | CCNG1                           | 0.77               | 0.019          |
| miR-9            | 1.68               | <0.001         | STK3                            | 0.69               | 0.018          |
| miR-9            | 1.68               | <0.001         | CNOT6L                          | 0.60               | 0.017          |
| miR-9            | 1.68               | <0.001         | SHC1                            | 0.69               | 0.015          |
| miR-9            | 1.68               | <0.001         | TLK1                            | 0.74               | 0.009          |
| miR-9            | 1.68               | <0.001         | SYNJ2BP                         | 0.61               | 0.007          |
| miR-9            | 1.68               | <0.001         | EIF5                            | 0.65               | 0.001          |
| miR-9            | 1.68               | <0.001         | XPO4                            | 0.74               | <0.001         |

15 **Supplemental Table 3. Association of direct microRNA targets with biological processes**  
 16 **in the fat x fiber x carcinogen comparison.** GO analysis was performed to identify the  
 17 enrichment of biological processes associated with the putative targets.

| <b>microRNA</b> | <b>ID</b>                                            | <b>Term</b>                                                                                     | <b>p-value</b> |
|-----------------|------------------------------------------------------|-------------------------------------------------------------------------------------------------|----------------|
| <b>miR-101</b>  | GO:0006468                                           | protein amino acid phosphorylation                                                              | 0.011          |
|                 | GO:0016310                                           | phosphorylation                                                                                 | 0.016          |
|                 | GO:0045859                                           | regulation of protein kinase activity                                                           | 0.018          |
|                 | GO:0051338                                           | regulation of transferase activity                                                              | 0.022          |
|                 | GO:0006796                                           | phosphate metabolic process                                                                     | 0.025          |
|                 | GO:0006793                                           | phosphorus metabolic process                                                                    | 0.025          |
|                 | GO:0010033                                           | response to organic substance                                                                   | 0.032          |
|                 | GO:0044237                                           | cellular metabolic process                                                                      | 0.034          |
|                 | GO:0042325                                           | regulation of phosphorylation                                                                   | 0.038          |
|                 | GO:0043687                                           | post-translational protein modification                                                         | 0.042          |
| <b>miR-107</b>  | GO:0007165                                           | signal transduction                                                                             | 0.008          |
|                 | GO:0007242                                           | intracellular signaling cascade                                                                 | 0.029          |
|                 | GO:0010817                                           | regulation of hormone levels                                                                    | 0.049          |
| <b>miR-140</b>  |                                                      | regulation of nucleobase, nucleoside, nucleotide<br>and nucleic acid metabolic process          | 0.099          |
|                 | GO:0019219                                           |                                                                                                 |                |
|                 | GO:0048468                                           | cell development                                                                                | 0.004          |
|                 | GO:0016043                                           | cellular component organization                                                                 | 0.013          |
|                 | GO:0044238                                           | primary metabolic process                                                                       | 0.016          |
|                 | GO:0043170                                           | macromolecule metabolic process                                                                 | 0.030          |
|                 | GO:0019538                                           | protein metabolic process                                                                       | 0.030          |
|                 | GO:0008152                                           | metabolic process                                                                               | 0.035          |
|                 | GO:0030154                                           | cell differentiation                                                                            | 0.038          |
|                 | GO:0048869                                           | cellular developmental process                                                                  | 0.042          |
| <b>miR-15b</b>  | GO:0030154                                           | cell differentiation                                                                            | 0.006          |
|                 | GO:0048869                                           | cellular developmental process                                                                  | 0.006          |
|                 |                                                      | positive regulation of nucleobase, nucleoside,<br>nucleotide and nucleic acid metabolic process | 0.013          |
|                 | GO:0045935                                           |                                                                                                 |                |
|                 |                                                      | positive regulation of macromolecule biosynthetic<br>process                                    | 0.014          |
|                 | GO:0010557                                           |                                                                                                 |                |
|                 | positive regulation of cellular biosynthetic process | 0.015                                                                                           |                |
|                 | GO:0031328                                           |                                                                                                 |                |
|                 | GO:0009891                                           | positive regulation of biosynthetic process                                                     | 0.016          |

|                |            |                                                  |       |
|----------------|------------|--------------------------------------------------|-------|
|                | GO:0007166 | cell surface receptor linked signal transduction | 0.029 |
|                | GO:0022604 | regulation of cell morphogenesis                 | 0.040 |
|                | GO:0022414 | reproductive process                             | 0.016 |
| <b>miR-93</b>  | GO:0048519 | negative regulation of biological process        | 0.044 |
| <b>miR-18a</b> | GO:0010556 | regulation of macromolecule biosynthetic process | 0.023 |
|                | GO:0010468 | regulation of gene expression                    | 0.024 |
|                | GO:0031326 | regulation of cellular biosynthetic process      | 0.027 |
|                | GO:0009889 | regulation of biosynthetic process               | 0.028 |
|                | GO:0009605 | response to external stimulus                    | 0.036 |
|                | GO:0080090 | regulation of primary metabolic process          | 0.042 |
|                | GO:0031323 | regulation of cellular metabolic process         | 0.048 |
|                | GO:0019222 | regulation of metabolic process                  | 0.058 |
|                | GO:0050794 | regulation of cellular process                   | 0.067 |
|                | GO:0050789 | regulation of biological process                 | 0.085 |
